# Supplementary material for: MiR-125b-5p Is Involved in Sorafenib Resistance through Ataxin-1-Mediated Epithelial-Mesenchymal Transition in Hepatocellular Carcinoma
Source: MDPI journal article supplement (doi:10.3390/cancers13194917), 2021-09-30
Supplement: s1 [file s1]

---

# **Supplementary Materials: MiR-125b-5p Is Involved in Sorafenib Resistance through Ataxin-1-Mediated Epithelial-Mesenchymal Transition in Hepatocellular Carcinoma**

Akihiro Hirao<sup>1</sup>, Yasushi Sato<sup>2,\*</sup>, Hironori Tanaka<sup>1</sup>, Tetsu Tomonari<sup>1</sup>, Kensei Nishida<sup>3</sup>, Misato Hirata<sup>1</sup>, Masahiro Bando<sup>1</sup>, Yoshifumi Kida<sup>1</sup>, Takahiro Tanaka<sup>1</sup>, Tomoyuki Kawaguchi<sup>1</sup>, Hironori Wada<sup>1</sup>, Tatsuya Taniguchi<sup>1</sup>, Koichi Okamoto<sup>1</sup>, Hiroshi Miyamoto<sup>1</sup>, Naoki Muguruma<sup>1</sup>, Toshihito Tanahashi<sup>1</sup>, Tetsuji Takayama<sup>1,\*</sup>

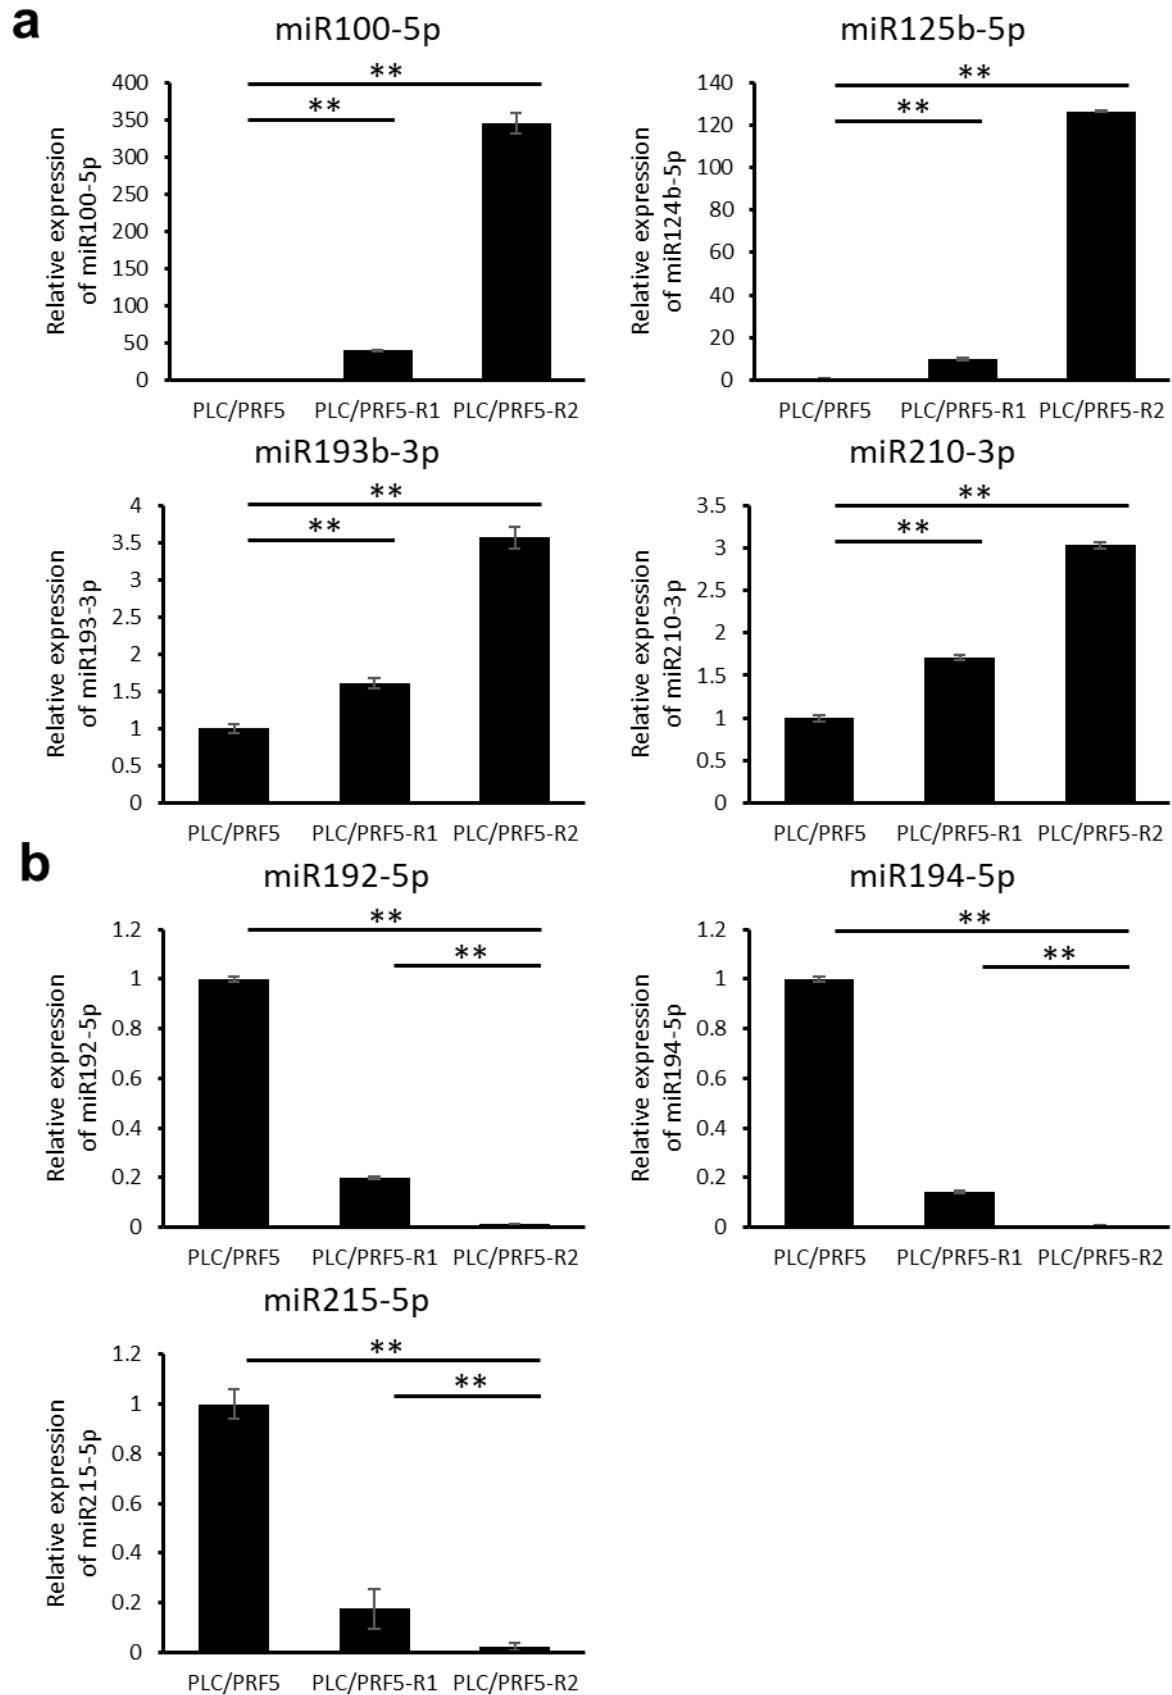

**Figure S1.** Validation of miRNA expression levels predicted by microRNA array in PLC/PRF5, PLC/PRF5-R1, and PLC/PRF5-R2 cells. The miRNA expression levels were determined by RT-PCR. (a) Upregulated miRNAs, (b) Downregulated miRNAs. Data are expressed as mean  $\pm$  SD. \*\* $p < 0.01$ .

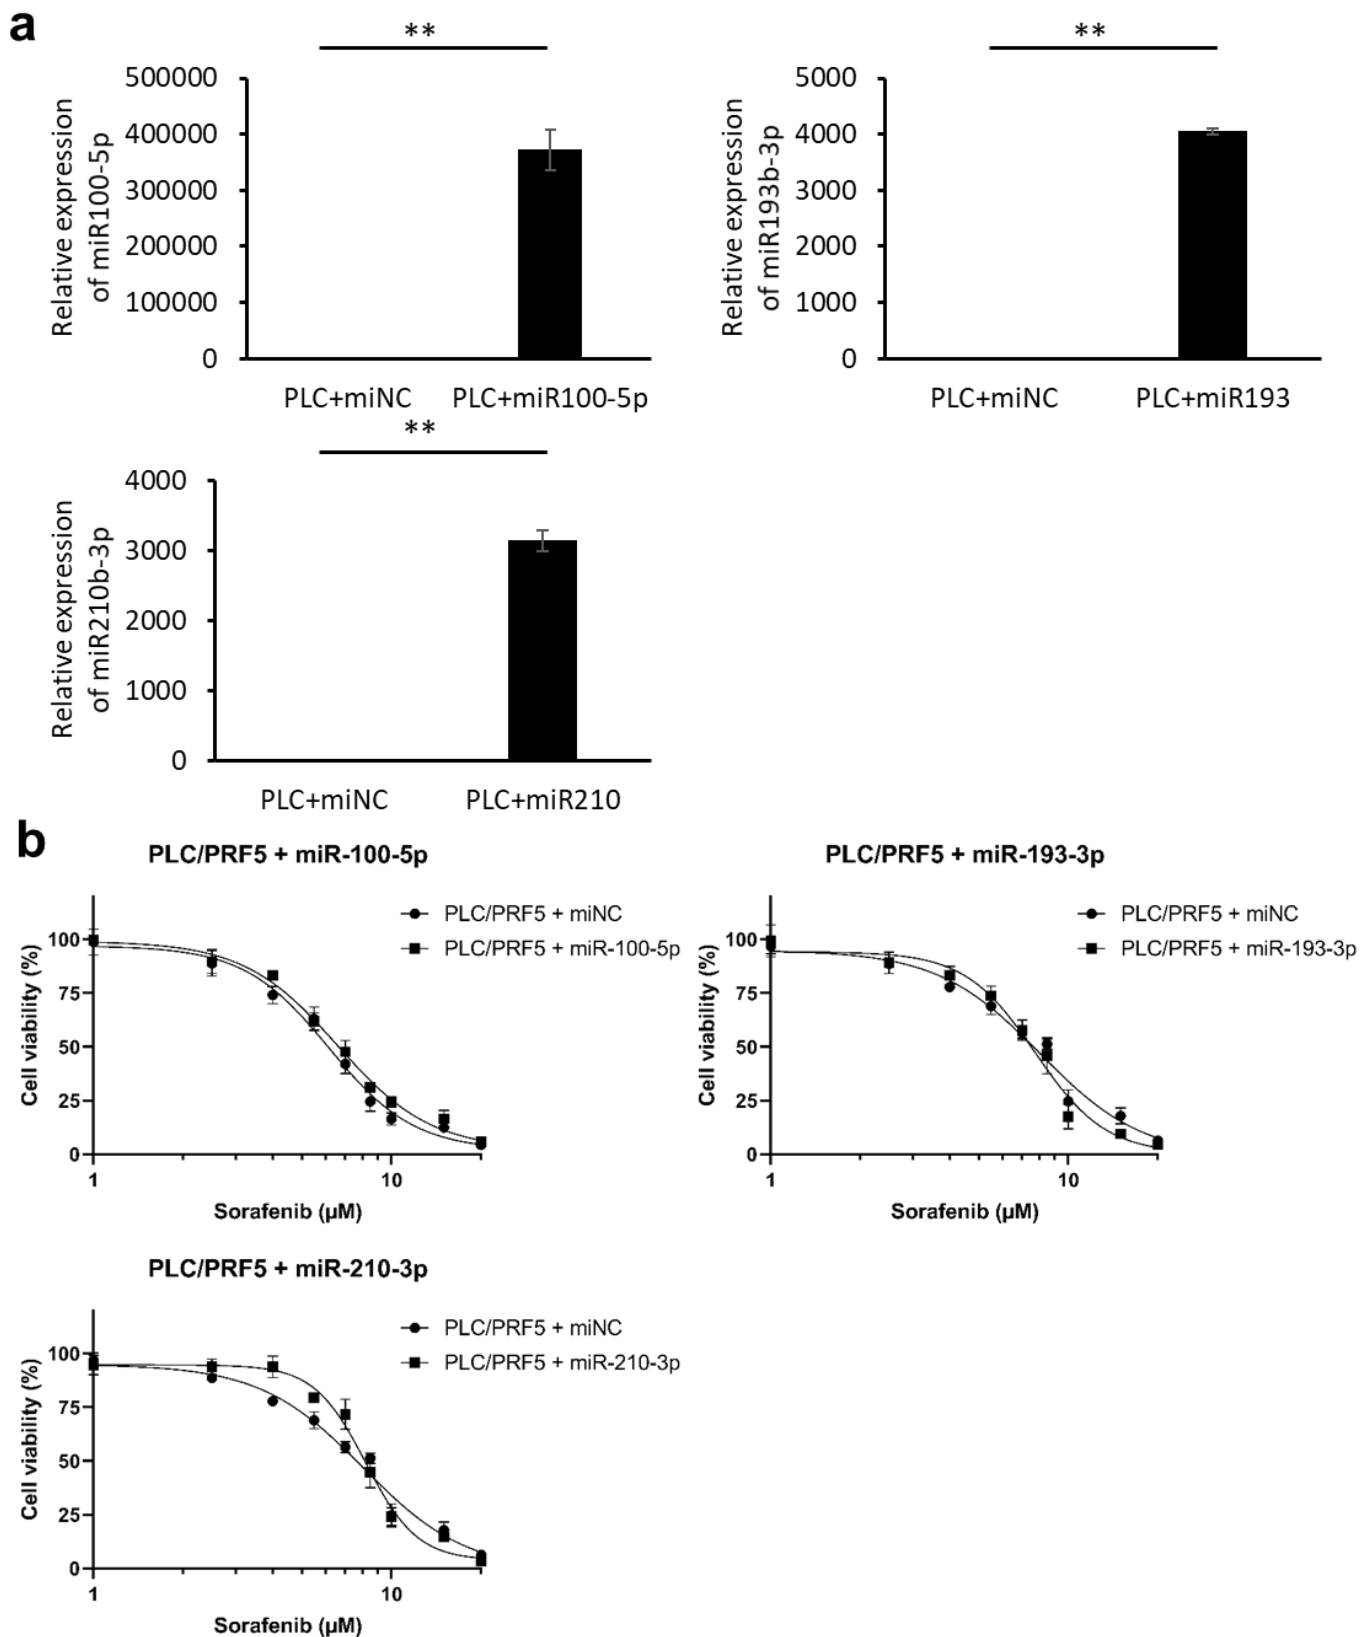

**Figure S2.** None of the miRNAs (miR-100-5p, miR-193, miR-210) had any effect on sorafenib resistance. **(a)** PLC/PRF5 cells were transfected with each miRNA (miR-100-5p, miR-193, miR-210) mimic or miNC, and the relative expression of miRNAs was measured by RT-PCR. \*\* $p < 0.01$ . **(b)** The cells were treated with various concentrations of sorafenib, and cell viability was measured by WST assay. IC<sub>50</sub> values against sorafenib were determined by non-linear regression analysis.

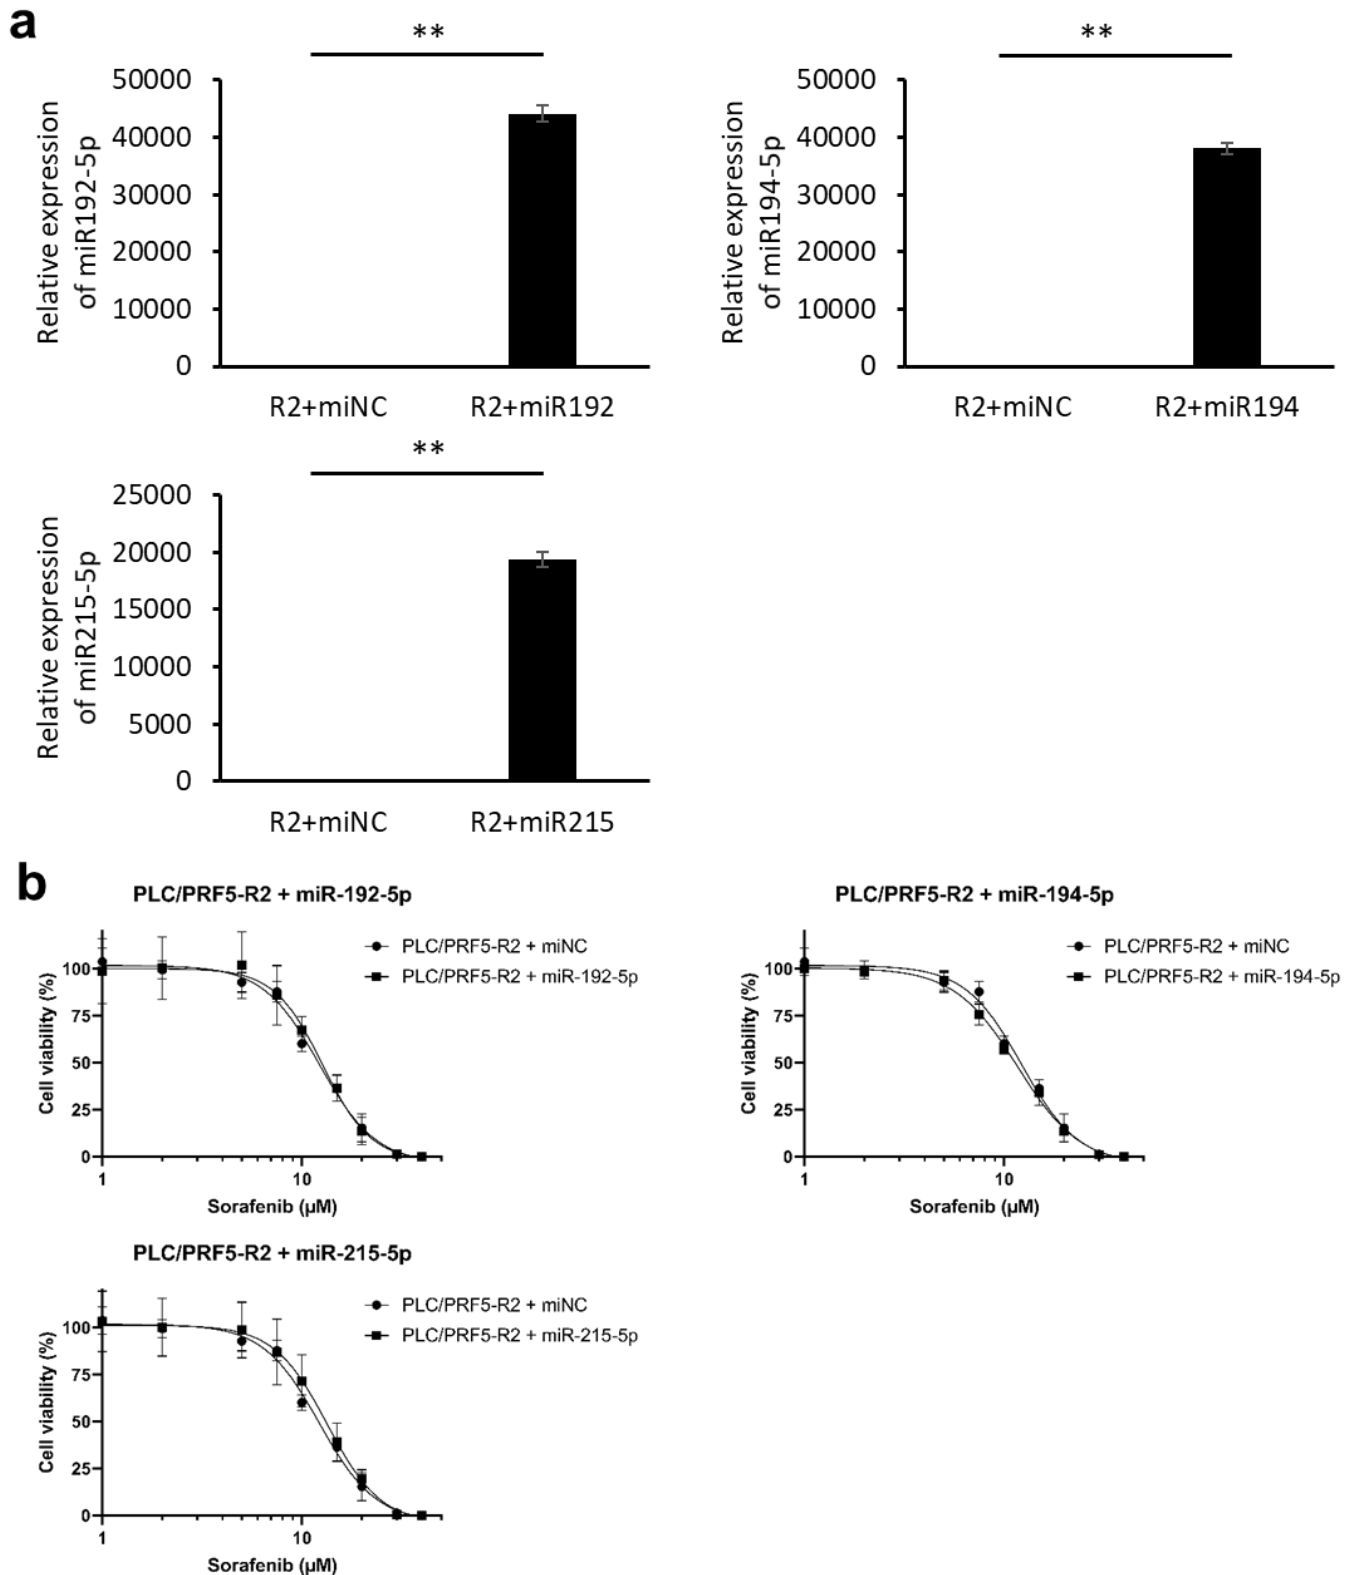

**Figure S3.** A None of the miRNAs (miR-192, miR-194, miR-215) had any effect on sorafenib resistance. (a) PLC/PRF5-R2 cells were transfected with each miRNAs (miR-192, miR-194, miR-215) mimics or miNC, and relative expressions of miRNA were measured by RT-PCR. \*\* $p < 0.01$ . (b) The cells were treated with various concentrations of sorafenib, and cell viability was measured by WST assay. IC<sub>50</sub> values against sorafenib were determined by non-linear regression analysis.

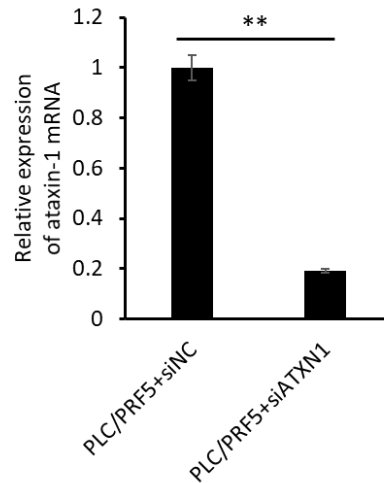

**Figure S4.** The relative mRNA expression levels of ataxin-1 in PLC/PRF5 cells transected with ataxin-1 siRNA (PLC/PRF5-siATXN1) and control siRNA. The ataxin-1 mRNA levels in PLC/PRF5-siATXN1 cells and PLC/PRL5 cells transfected with siRNA negative control were determined by RT-PCR. The values were compared and analyzed by Student's t test. \*\*p<0.01.

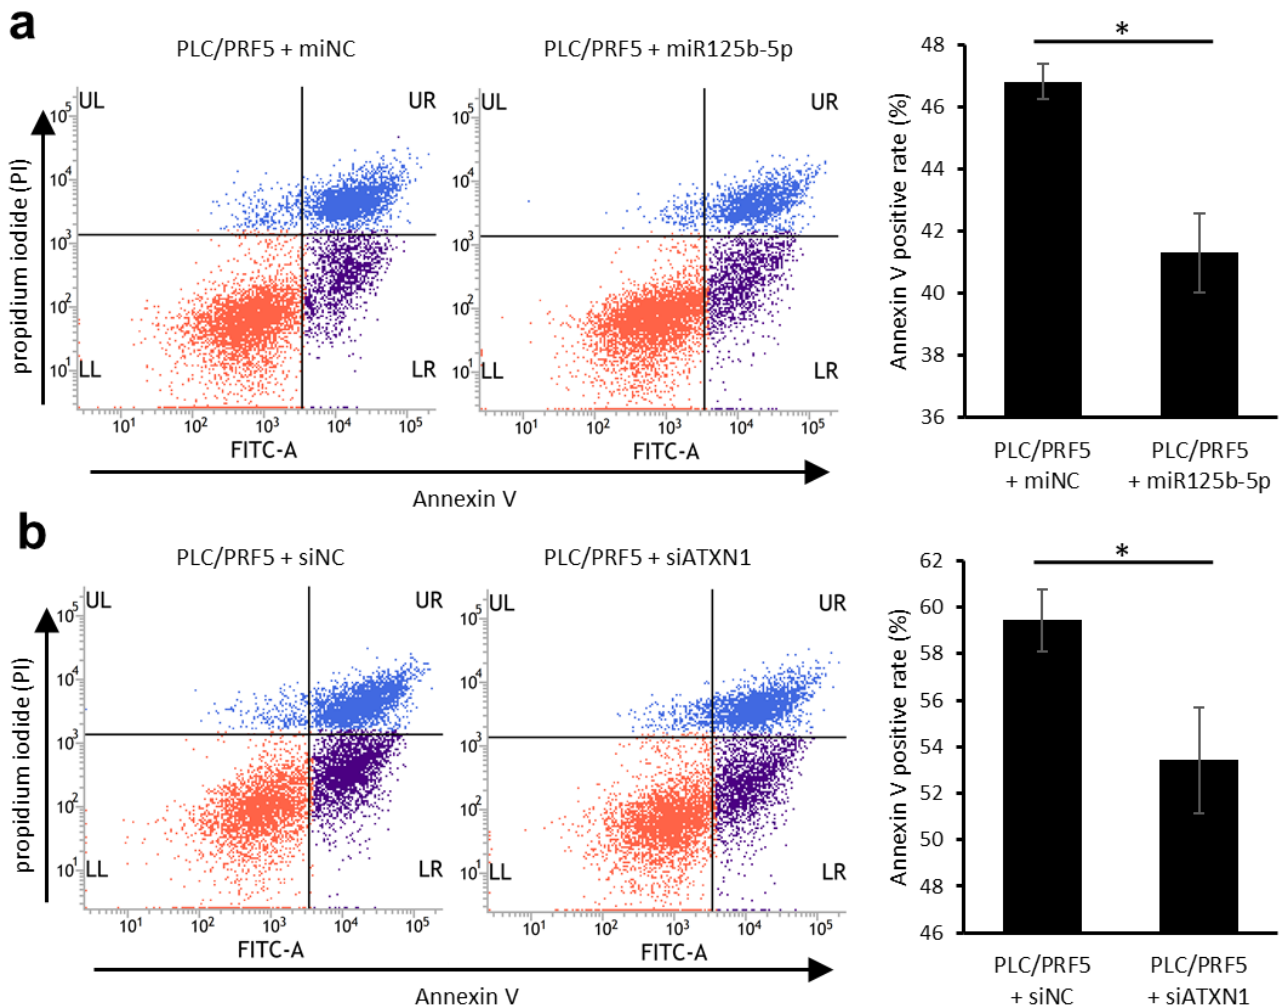

**Figure S5.** Apoptosis was suppressed in HCC cells after treatment with miR-125b-5p mimic or siRNA-ATXN1. (a) Flow cytometric analysis of PLC/PRF5 cells treated with miNC or miR125b-5p mimic for annexin V-FITC and propidium iodide (PI) staining of cells treated with sorafenib (10  $\mu$ M). (b) Flow cytometric analysis of PLC/PRF5 cells treated with siNC or siATXN1. Data represent mean  $\pm$  SD of triplicate experiments. \*p < 0.05 by Student's t test.

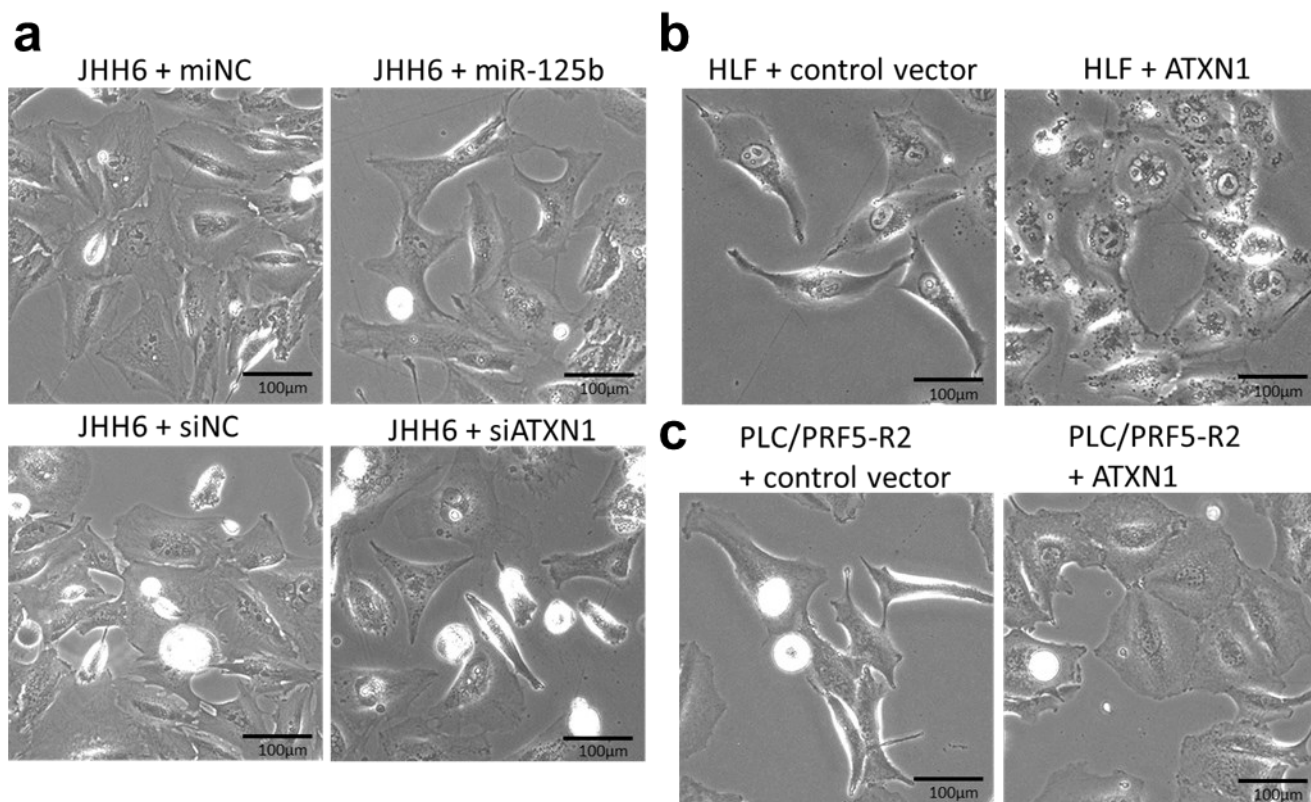

**Figure S6.** The phenotypical changes of HCC cell lines treated with miR-125b-5p mimic or siRNA-ATXN1, ATXN1 expression vector. (a) Representative images of JHH6-miNC, JHH6-miR125b, JHH6-siNC and JHH6-siATXN1 cells under observation with a stereoscopic microscope are shown. Scale bars, 100  $\mu$ m; (b) Representative images of HLF cells treated with control vector or ataxin1 expression vector; (c) Representative images of PLC/PRF5-R2 cells treated with control vector or ataxin1 expression vector.

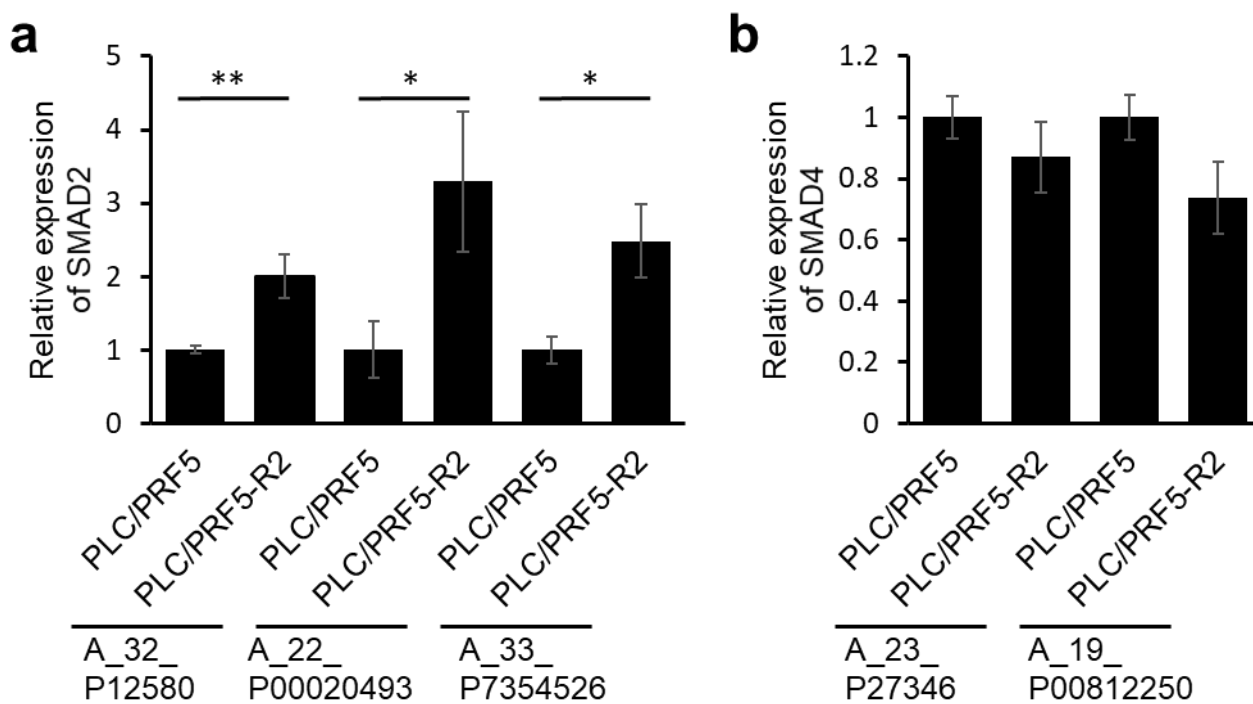

**Figure S7.** The SMAD2/4 expression in PLC/PRF5-R2 and PLC/PRF5 cells as revealed by microarray analysis. **(a)** The SMAD2 mRNA expression levels examined using 3 kinds of probes (A\_32\_P12580, A\_22\_P00020493, A\_33\_P7354526) are shown. **(b)** The SMAD4 mRNA expression levels examined using 2 kinds of probes (A\_23\_P27346, A\_19\_P00812250) are shown. \* $p < 0.05$ , \*\* $p < 0.01$ .

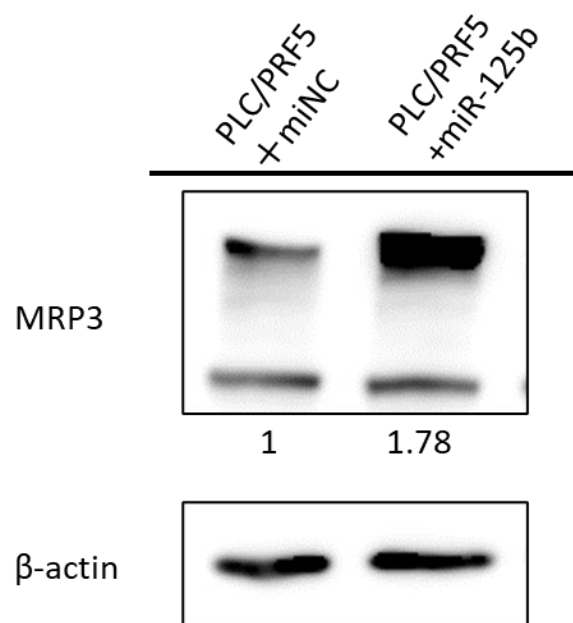

**Figure S8.** Expression of MRP3 in PLC/PRF5-miNC and PLC/PRF5-miR125b cells. The expression of MRP3 was examined by western blot analysis. Densitometry analysis indicates relative protein levels from 1 representative of 3 independent experiments. Numbers below the bands represent protein expression normalized to  $\beta$ -actin.



Fig 2c E-cad/Snail/B-actin

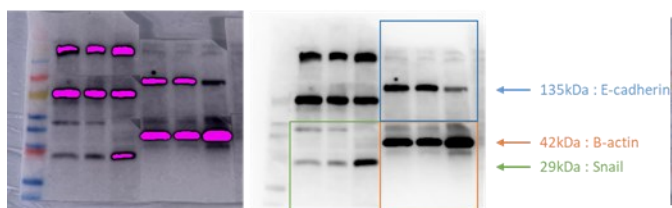

Fig 2c Vimentin/B-actin

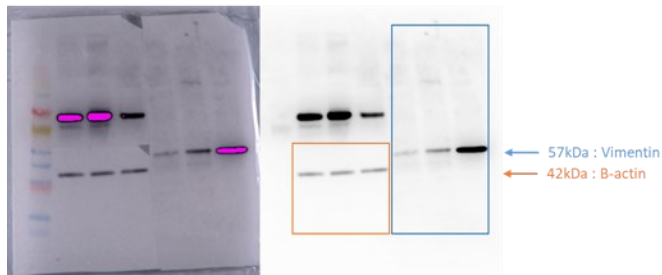

Fig3e

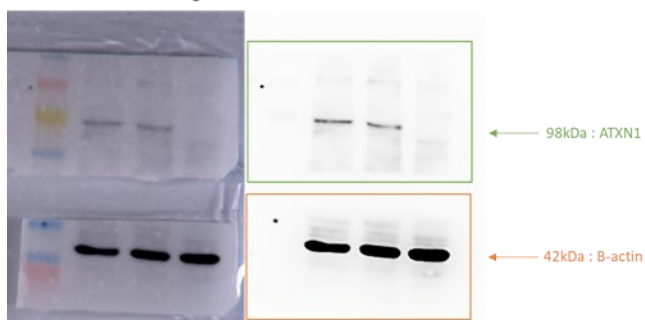

Fig 4a ATXN1/Vimentin/B-actin

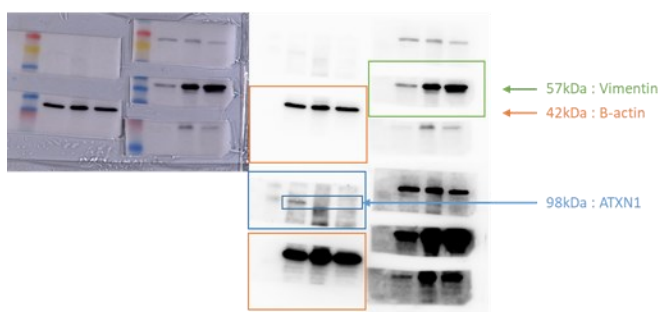

Fig 4a Snail/B-actin

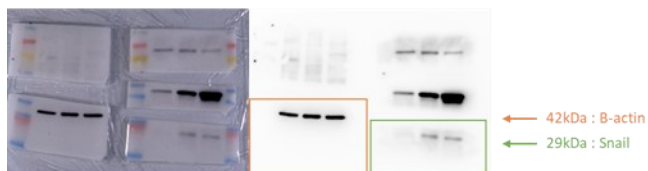

Fig 4a E-cadherin/B-actin

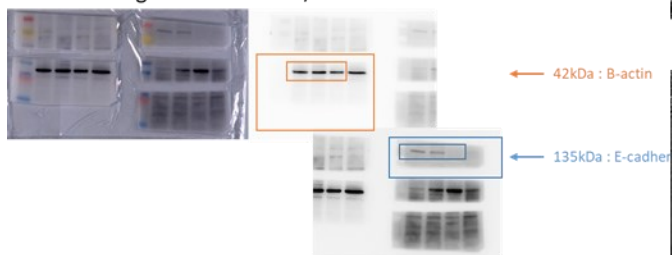

Fig 6c E-cadherin, B-actin, Snail, ATXN1

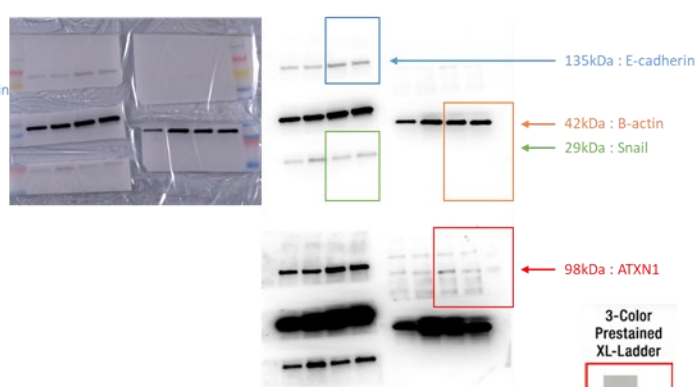

Fig 6c, d Vimentin

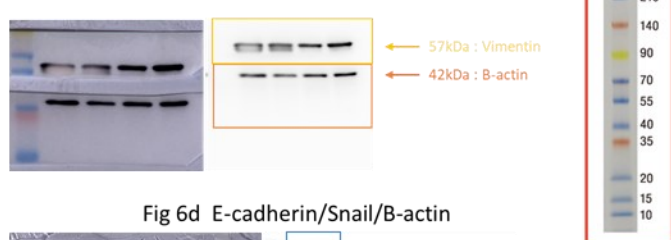

Fig 6d E-cadherin/Snail/B-actin

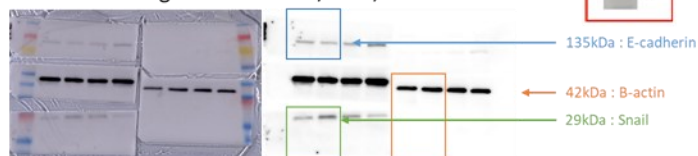

Fig 6d ATXN1/B-actin

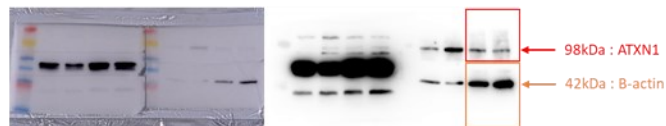

Fig 6g,h E-cadherin/Vimentin/B-actin

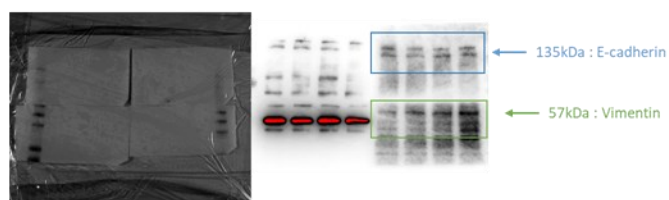

Fig 6g,h Snail/B-actin

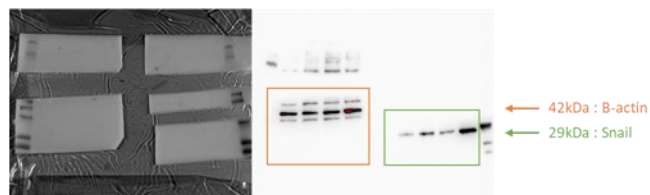

Fig 6g,h ATXN1

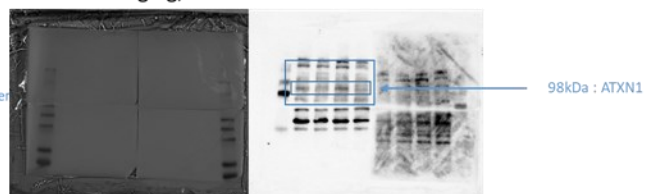

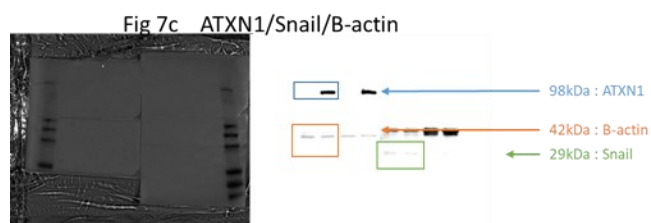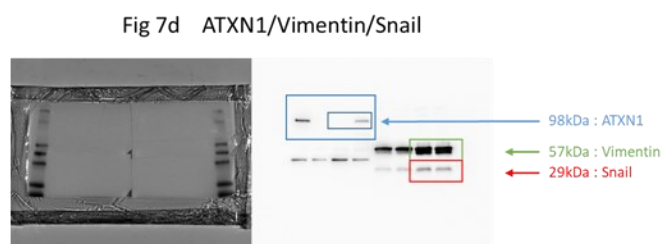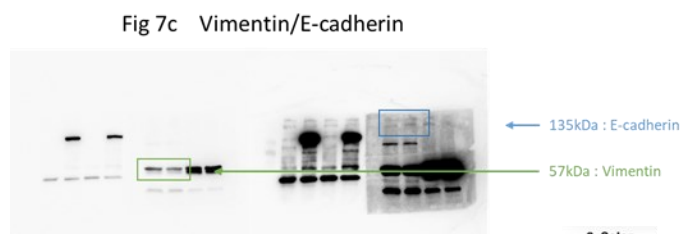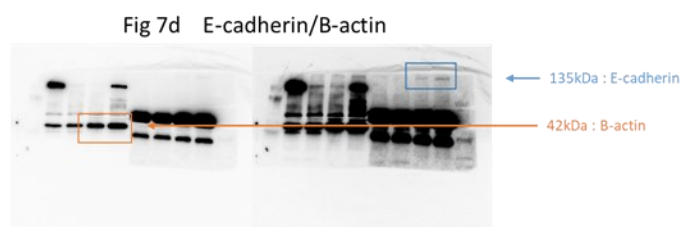

Supplemental Figure 8 MRP3/B-actin

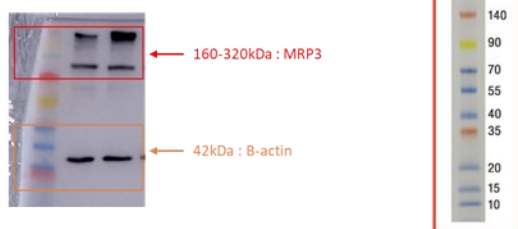

Figure S9. Uncropped western blot images.

**Table S1.** Taqman Assay of each miRNAs and genes

|                                | Reagents        |               | source             |
|--------------------------------|-----------------|---------------|--------------------|
| TaqMan™ MicroRNA Assay         | hsa-miR-100-5p  | 000437        | Applied Biosystems |
| TaqMan™ MicroRNA Assay         | hsa-miR-125b-5p | 000449        | Applied Biosystems |
| TaqMan™ MicroRNA Assay         | hsa-miR-192-5p  | 000491        | Applied Biosystems |
| TaqMan™ MicroRNA Assay         | hsa-miR-193b-3p | 002367        | Applied Biosystems |
| TaqMan™ MicroRNA Assay         | hsa-miR-194-5p  | 000493        | Applied Biosystems |
| TaqMan™ MicroRNA Assay         | hsa-miR-210-3p  | 000512        | Applied Biosystems |
| TaqMan™ MicroRNA Assay         | hsa-miR-215-5p  | 000518        | Applied Biosystems |
| TaqMan™ MicroRNA Assay         | U6              | 001973        | Applied Biosystems |
| TaqMan® Gene Expression Assays | ATXN1           | Hs00165656_m1 | Applied Biosystems |

**Table S2.** miRNA mimics and siRNAs

|                          | Reagents            |              | source             |
|--------------------------|---------------------|--------------|--------------------|
| mirVana® miRNA mimic     | hsa-miR-100-5p      | MIMAT0000098 | Applied Biosystems |
| mirVana® miRNA mimic     | hsa-miR-125b-5p     | MIMAT0000423 | Applied Biosystems |
| mirVana® miRNA mimic     | hsa-miR-192-5p      | MIMAT0000222 | Applied Biosystems |
| mirVana® miRNA mimic     | hsa-miR-193b-3p     | MIMAT0002819 | Applied Biosystems |
| mirVana® miRNA mimic     | hsa-miR-194-5p      | MIMAT0000460 | Applied Biosystems |
| mirVana® miRNA mimic     | hsa-miR-210-3p      | MIMAT0000267 | Applied Biosystems |
| mirVana® miRNA mimic     | hsa-miR-215-5p      | MIMAT0000272 | Applied Biosystems |
| mirVana® miRNA mimic     | Negative Control #1 |              | Applied Biosystems |
| Silencer Select          | ATXN1               | s12488       | Applied Biosystems |
| Halo Tag® Control Vector | Negative Control    |              | Promega            |
| pFN21AB7066              | ATXN1               | KIBB7066     | Promega            |
| MISSION® Lenti microRNA  | hsa-miR-125b-5p     | MIMAT0000423 | Sigma-Aldrich      |
| MISSION® Lenti microRNA  | Negative Control 1  |              | Sigma-Aldrich      |

**Table S3. Primer sets**

| Primers for cloning the ATXN1 promoter region                       |         |                                                                                                               |
|---------------------------------------------------------------------|---------|---------------------------------------------------------------------------------------------------------------|
| primer sequences (5' - 3')                                          |         |                                                                                                               |
|                                                                     | forward | AAAAAAGCTAGCGGTGAGGGTACCTGTGCAGT                                                                              |
|                                                                     | reverse | AAAAAAAAGCTTGTAAATGGATCTGGGGTTGC                                                                              |
| Oligonucleotides of <i>ATXN1</i> 3'UTR inserted to psiCHECK2 vector |         |                                                                                                               |
| miR-125b-5p binding site 1                                          |         |                                                                                                               |
| sequences (5' - 3')                                                 |         |                                                                                                               |
| Wild type                                                           | forward | TCGAGCTTGCTTAATCTTCCATATATTCTGCTCAGGG-<br>CACTTGCAATTATTAGGTTTTGTTTGC<br>GGCCGCAAACAAAACCTAATAATT-            |
|                                                                     | reverse | GCAAGTGCCCTGAGCAGAATATATGGAAGATTAA-<br>GCAAGC                                                                 |
| Mutant 1                                                            | forward | TCGAGCTTGCTTAATCTTCCATATATTCTGA-<br>GACTTTCACCTTGCAATTATTAGGTTTTGTTTGC<br>GGCCGCAAACAAAACCTAATAATT-           |
|                                                                     | reverse | GCAAGTGAAAGTCTCAGAATATATGGAAGATTAA-<br>GCAAGC                                                                 |
| Mutant 2                                                            | forward | TCGAGCTTGCTTAATCTTCCATATATTCTGGAG-<br>TCCCCACTTGCAATTATTAGGTTTTGTTTGC<br>GGCCGCAAACAAAACCTAATAATTGCAAGTGGG-   |
|                                                                     | reverse | GACTCCAGAATATATGGAAGATTAAGCAAGC                                                                               |
| miR-125b-5p binding site 2                                          |         |                                                                                                               |
| sequences (5' - 3')                                                 |         |                                                                                                               |
| Wild type                                                           | forward | TCGAGTCTGCGGAACCTTTCACAC-<br>CTCTTTCTCAGGGACGGGGCAGGTGTGTGTGTGG-<br>TACACGC<br>GGCCGCGTGTACCACACACACAC-       |
|                                                                     | reverse | CTGCCCCGTCCCTGAGAAA-<br>GAGGTGTGAAAGGTTCCGCAGAC                                                               |
| Mutant 1                                                            | forward | TCGAGTCTGCGGAACCTTTCACACCTCTTTA-<br>GACTTTACGGGGCAGGTGTGTGTGTGGTACACGC<br>GGCCGCGTGTACCACACACACACCTGCCCCG-    |
|                                                                     | reverse | TAAAGTCTAAAGAGGTGTGAAAGGTTCCGCAGAC                                                                            |
| Mutant 2                                                            | forward | TCGAGTCTGCGGAACCTTTCACACCTCTTTGAG-<br>TCCCACGGGGCAGGTGTGTGTGTGGTACACGC<br>GGCCGCGTGTACCACACACACACCTGCCCCGTGG- |
|                                                                     | reverse | GACTCAAAGAGGTGTGAAAGGTTCCGCAGAC                                                                               |

**Table S4. High expression of 6 miRNAs in PLC/PRF5-R1 compared with parent cells**

| Systematic name | mirbase accession No | FC (PLC vs R1) <sup>1</sup> |
|-----------------|----------------------|-----------------------------|
| hsa-miR-100-5p  | MIMAT0000098         | 241.1368                    |
| hsa-miR-125b-5p | MIMAT0000423         | 34.69279                    |
| hsa-miR-193b-3p | MIMAT0002819         | 2.345073                    |
| hsa-miR-210-3p  | MIMAT0000267         | 2.263242                    |
| hsa-miR-494-3p  | MIMAT0002816         | 2.027126                    |
| hsa-miR-7641    | MIMAT0029782         | 2.035562                    |

<sup>1</sup> Fold change in expression of miRNA between PLC/PRF5 and PLC/PRF5-R1

**Table S5.** High expression of 7 miRNAs in PLC/PRF5-R2 compared with parent cells

| Systematic name | mirbase accession No | FC (PLC vs R2) <sup>1</sup> |
|-----------------|----------------------|-----------------------------|
| hsa-miR-100-5p  | MIMAT0000098         | 2085.995                    |
| hsa-miR-125b-5p | MIMAT0000423         | 379.0602                    |
| hsa-miR-193b-3p | MIMAT0002819         | 4.418106                    |
| hsa-miR-210-3p  | MIMAT0000267         | 4.213196                    |
| hsa-let-7a-5p   | MIMAT0000062         | 2.94759                     |
| hsa-let-7e-5p   | MIMAT0000066         | 3.843901                    |
| hsa-let-7f-5p   | MIMAT0000067         | 2.755421                    |

<sup>1</sup> Fold change in expression of miRNA between PLC/PRF5 and PLC/PRF5-R2

**Table S6.** Potential targets of miR-125b-5p

| Target Rank | Target Score | Gene Symbol |
|-------------|--------------|-------------|
| 1           | 99           | FREM1       |
| 2           | 99           | PPP4R3A     |
| 3           | 99           | SH3TC2      |
| 4           | 99           | BMF         |
| 5           | 99           | STARD13     |
| 6           | 99           | ZNF704      |
| 7           | 99           | GCNT1       |
| 8           | 99           | ARID3B      |
| 9           | 98           | IER3IP1     |
| 10          | 98           | BLZF1       |
| 11          | 97           | KLF13       |
| 12          | 97           | CGN         |
| 13          | 97           | NUP210      |
| 14          | 97           | NIPAL4      |
| 15          | 97           | IRF4        |
| 16          | 97           | RORA        |
| 17          | 97           | DOCK3       |
| 18          | 97           | KCNS3       |
| 19          | 97           | TMEM135     |
| 20          | 97           | NBEAL2      |
| 21          | 97           | BAK1        |
| 22          | 97           | ACHE        |
| 23          | 97           | KCNK10      |
| 24          | 96           | JADE2       |
| 25          | 96           | PI4K2B      |
| 26          | 96           | ZNF543      |
| 27          | 96           | CYP24A1     |
| 28          | 96           | ZSCAN29     |
| 29          | 96           | KCTD15      |
| 30          | 96           | ZSWIM6      |
| 31          | 96           | NPL         |
| 32          | 96           | TTPA        |
| 33          | 95           | ETS1        |
| 34          | 95           | SLC37A2     |
| 35          | 95           | SBNO1       |
| 36          | 95           | PRTG        |
| 37          | 95           | KIAA1841    |
| 38          | 95           | ANAPC16     |
| 39          | 95           | OSBPL9      |
| 40          | 95           | LIPA        |
| 41          | 95           | SSTR3       |
| 42          | 95           | MTF1        |
| 43          | 95           | DUS1L       |
| 44          | 95           | VPS4B       |
| 45          | 95           | CDH5        |
| 46          | 95           | NECAB3      |
| 47          | 95           | ENPEP       |
| 48          | 94           | SLC39A9     |
| 49          | 94           | ATXN1       |
| 50          | 94           | SEL1L       |
